# Supplementary material for: A self-assembly method for the fabrication of a three-dimensional (3D) polypyrrole (PPy)/poly(3,4-ethylenedioxythiophene) (PEDOT) hybrid composite with excellent absorption performance against electromagnetic pollution
Source: Royal Society of Chemistry journal article supplement (doi:10.1039/c5tc02887f), 2015-11-18
Supplement: c5tc02887f1.pdf [file c5tc02887f1.pdf]

Electronic supplementary information

**A self-assembly method for the fabrication of three-dimensional (3D) polypyrrole (PPy)/poly(3,4-ethylenedioxythiophene) (PEDOT) hybrid composite with excellent absorption performance against electromagnetic pollution**

Fan Wu,<sup>a\*</sup> Mengxiao Sun,<sup>ab</sup> Wanchun Jiang,<sup>a</sup> Kun Zhang,<sup>ac</sup> Aming Xie,<sup>ad\*</sup> Yuan Wang,<sup>a\*</sup> Mingyang Wang<sup>ad</sup>

<sup>a</sup> *State Key Laboratory for Disaster Prevention & Mitigation of Explosion & Impact, PLA University of Science and Technology, Nanjing 210007, P. R. China.*

<sup>b</sup> *Key Laboratory of Science and Technology on Electromagnetic Environmental Effects and Electro-optical Engineering, PLA University of Science and Technology, Nanjing 210007, P. R. China.*

<sup>c</sup> *School of Chemical Engineering, Nanjing University of Science & Technology, Nanjing 210094, P. R. China.*

<sup>d</sup> *School of Mechanical Engineering, Nanjing University of Science & Technology, Nanjing 210094, P. R. China.*

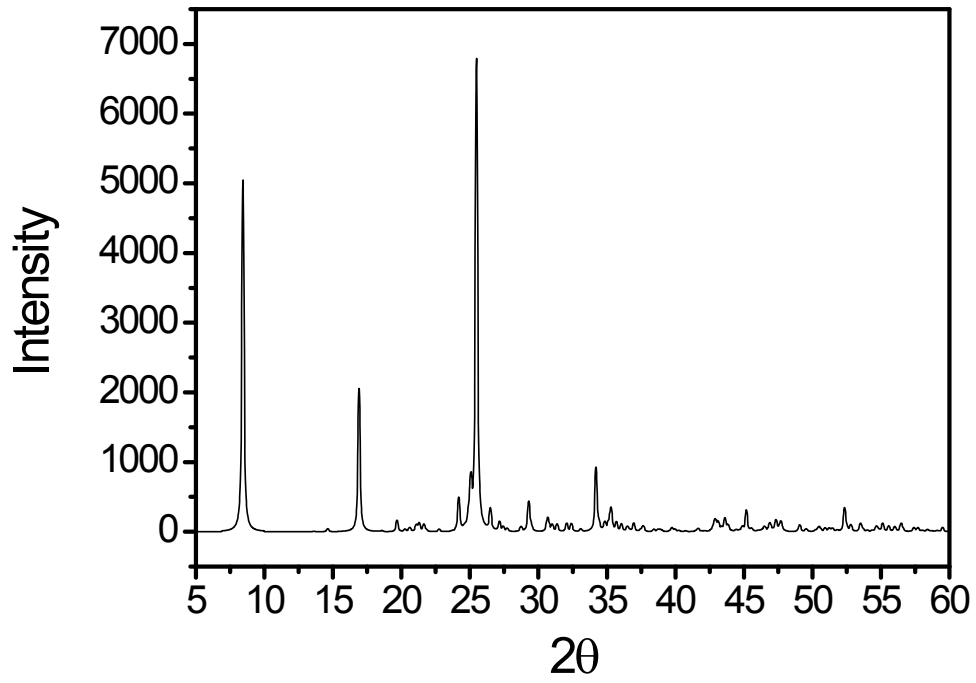

Fig. S1. Simulated X-ray powder diffraction pattern of DBEDOT with strong preferred orientation.
